# Supplementary material for: UV spectroscopy of cold ions as a probe of the protonation site
Source: Royal Society of Chemistry journal article supplement (doi:10.1039/c5cp01122a), 2015-01-01
Supplement: c5cp01122a1.pdf [file c5cp01122a1.pdf]

## UV spectroscopy of cold ions as a diagnostics of the protonation site.

Géraldine Féraud, Natalia Esteves-López, Claude Dedonder-Lardeux, Christophe Juvet

### Supplementary information

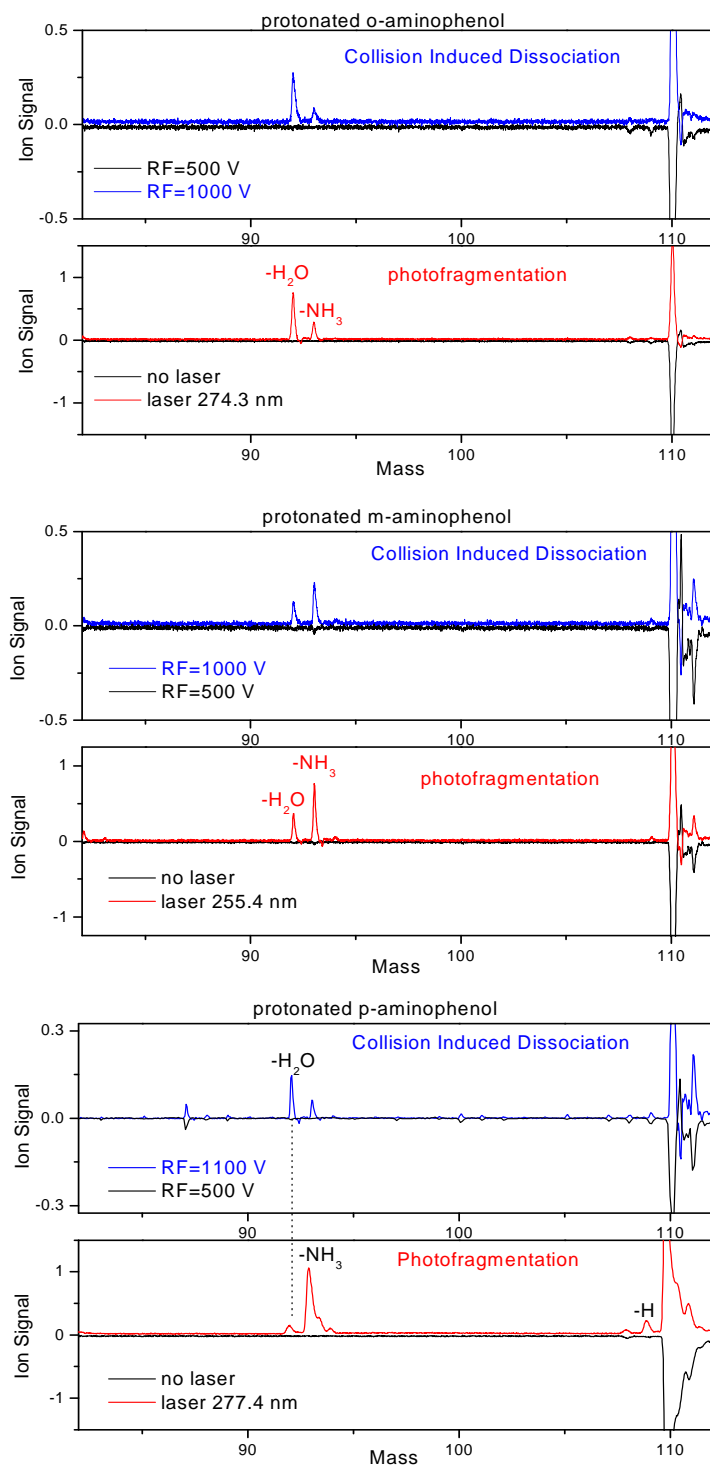

Figure SI.1: Mass spectra of photon induced fragmentation for protonated aminophenol isomers compared with collision induced fragmentation. The H loss channel, specific of the UV fragmentation, is observed only for the *para* isomer.

## Evaluation of the temperature of the ions in the cold ion trap

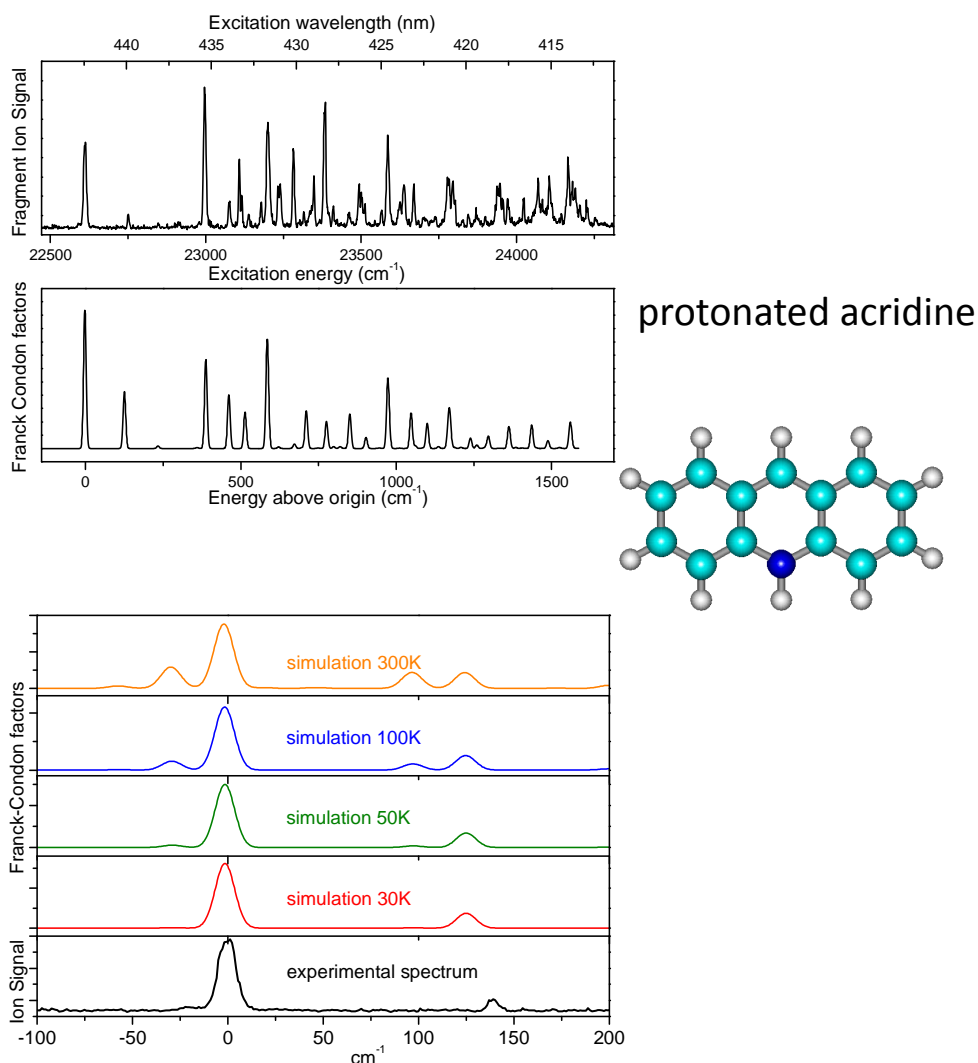

Figure SI.2: protonated acridine was chosen since its vibrational spectroscopy is well reproduced by Franck-Condon simulations using ground and excited state calculated frequencies as can be seen in the upper part of the figure: comparison between the experimental (upper trace) and calculated (lower trace) spectra. In the lower part of the figure: comparison between the experimental spectrum (lower trace) and spectra calculated at different temperatures. The hot band at  $-25\text{ cm}^{-1}$  is not observed in the experimental spectrum, which sets an upper limit for the ion temperature at 50K.

Table SI.1: Calculated ground state energies for the trans *ortho*-aminophenolH<sup>+</sup> and *para*-aminophenolH<sup>+</sup> at the DFT/B3LYP/cc-pVDZ level.

| DFT/B3LYP/cc-PVDZ                             |                                |                                                       |
|-----------------------------------------------|--------------------------------|-------------------------------------------------------|
| Trans <i>ortho</i> -aminophenolH <sup>+</sup> |                                |                                                       |
| tautomer                                      | Calculated energy<br>(Hartree) | Energy relative to<br>the most stable<br>tautomer(eV) |
| NH3                                           | - 362.9946                     | 0                                                     |
| C3                                            | - 362.9830                     | 0.30                                                  |
| C4                                            | - 362.9714                     | 0.61                                                  |
| C5                                            | - 362.9810                     | 0.36                                                  |
| C6                                            | - 362.9830                     | 0.30                                                  |
| <i>para</i> -aminophenolH <sup>+</sup>        |                                |                                                       |
| NH3                                           | - 362.9894                     | 0                                                     |
| C2                                            | - 362.9656                     | 0.65                                                  |
| C3                                            | - 362.9805                     | 0.24                                                  |

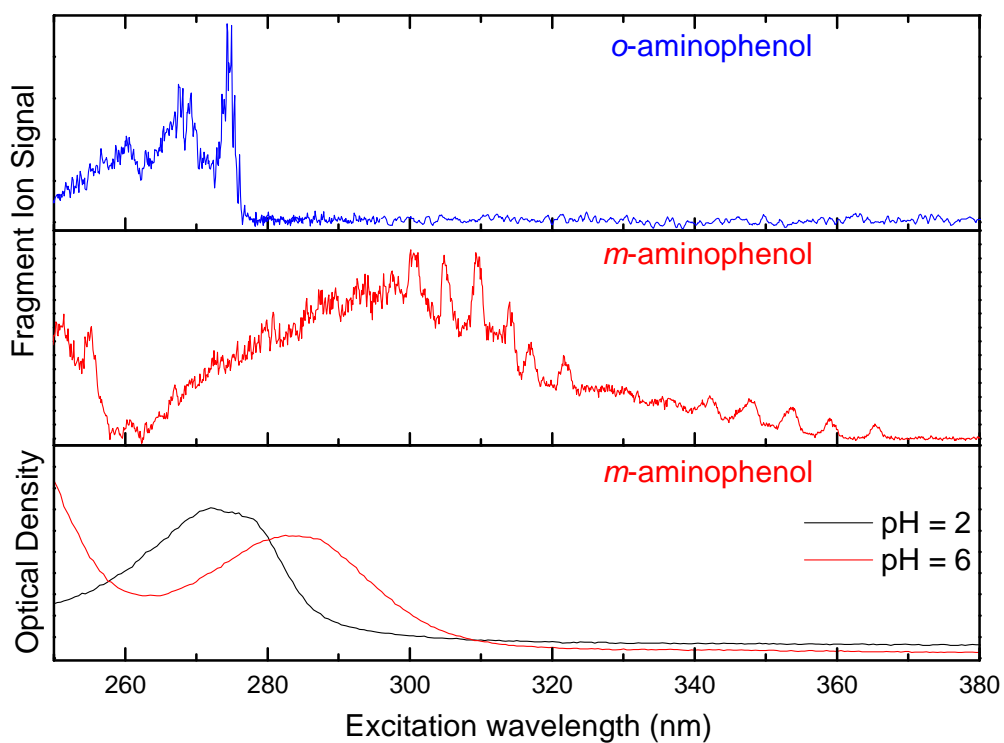

Figure SI.3: Comparison between gas phase photofragmentation spectra of protonated aminophenols and liquid phase absorption spectra for *m*-aminophenol at different pHs. The condensed phase spectra have been recorded with a CARY spectrophotometer, the solution being  $10^{-4}$  molar in a 50/50 methanol/water solvent, as that used in the electrospray source. At low pH, *m*-aminophenol is expected to be protonated and the spectrum exhibits a band at 275 nm, the signature of protonation on the amino group, which is in good agreement with calculations.
